# Supplementary material for: Poly(ethylene glycol) Diacrylate Hydrogel with Silver Nanoclusters for Water Pb(II) Ions Filtering
Source: MDPI journal article supplement (doi:10.3390/gels9020133), 2023-02-04
Supplement: s1 [file s1]

# Poly(Ethylene Glycol) Diacrylate Hydrogel with Silver Nanoclusters for Water Pb(II) Ions Filtering

Luca Burratti <sup>1,\*</sup>, Marco Zannotti <sup>2,\*</sup>, Valentin Maranges <sup>1</sup>, Rita Giovannetti <sup>2</sup>, Leonardo Duranti <sup>3</sup>, Fabio De Matteis <sup>1</sup>, Roberto Francini <sup>1</sup> and Paolo Proposito <sup>1</sup>

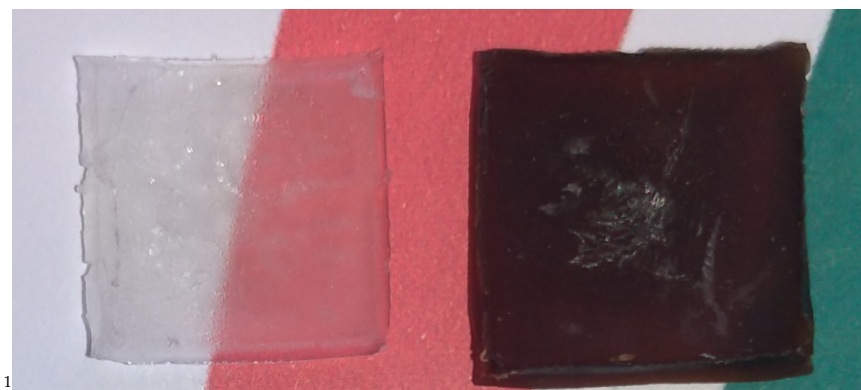

**Figure S1.** Picture of dried filters: unmodified PEGDA hydrogel (left); modified with AgNCs-PMMA hydrogel (right).

**Citation:** Burratti, L.; Zannotti, M.; Maranges, V.; Giovannetti, R.; Duranti, L.; De Matteis, F.; Francini, R.; Proposito, P. Poly(Ethylene Glycol) Diacrylate Hydrogel with Silver Nanoclusters for Water Pb(II) Ions Filtering. *Gels* **2023**, *9*, x. <https://doi.org/10.3390/xxxxx>

Academic Editor(s): Avinash J. Patil

Received: 13 January 2023

Revised: 25 January 2023

Accepted: 1 February 2023

Published: date

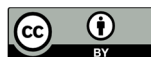

**Copyright:** © 2023 by the authors. Submitted for possible open access publication under the terms and conditions of the Creative Commons Attribution (CC BY) license (<https://creativecommons.org/licenses/by/4.0/>).

## Error analysis

The error in Removal Efficiency (RE) in percentage was calculated according with the general propagation of error, by applying the following formula:

$$\delta_{RE} = \sqrt{\left[\frac{\partial RE}{\partial C_i} \delta_{C_i}\right]^2 + \left[\frac{\partial RE}{\partial C_e} \delta_{C_e}\right]^2} * 100 \quad (S1)$$

Where  $\delta_{C_i}$  and  $\delta_{C_e}$  represent the absolute errors of initial and equilibrium concentrations, respectively.

About the error in adsorption capacity ( $q_e$ ) [i.e.  $\delta(q_e)$ ] was found by applying the general propagation error as follow:

$$\delta q_e = \sqrt{\left[\frac{\partial q_e}{\partial C_i} \delta_{C_i}\right]^2 + \left[\frac{\partial q_e}{\partial C_e} \delta_{C_e}\right]^2 + \left[\frac{\partial q_e}{\partial V} \delta_V\right]^2 + \left[\frac{\partial q_e}{\partial m} \delta_m\right]^2} \quad (S2)$$

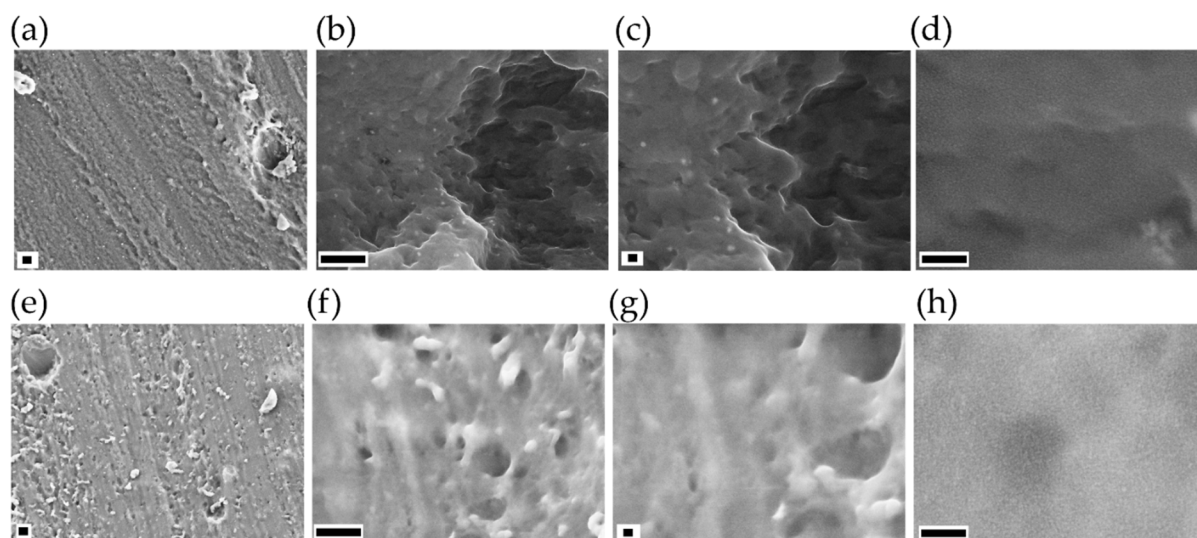

**Figure S2.** SEM images at different magnification of samples with 14%wt of PEGDA and without NCs (a)-(d) (from left to right: 10kX scale bare 1  $\mu$ m, 50kX scale bar 1  $\mu$ m, 100kX scale bar 100 nm, 500kX scale bar 100 nm); and with 255 mg of AgNCs-PMAA (e)-(h) (from left to right: 10kX scale bare 1  $\mu$ m, 50kX scale bar 1  $\mu$ m, 100kX scale bar 100 nm, 500kX scale bar 100 nm).

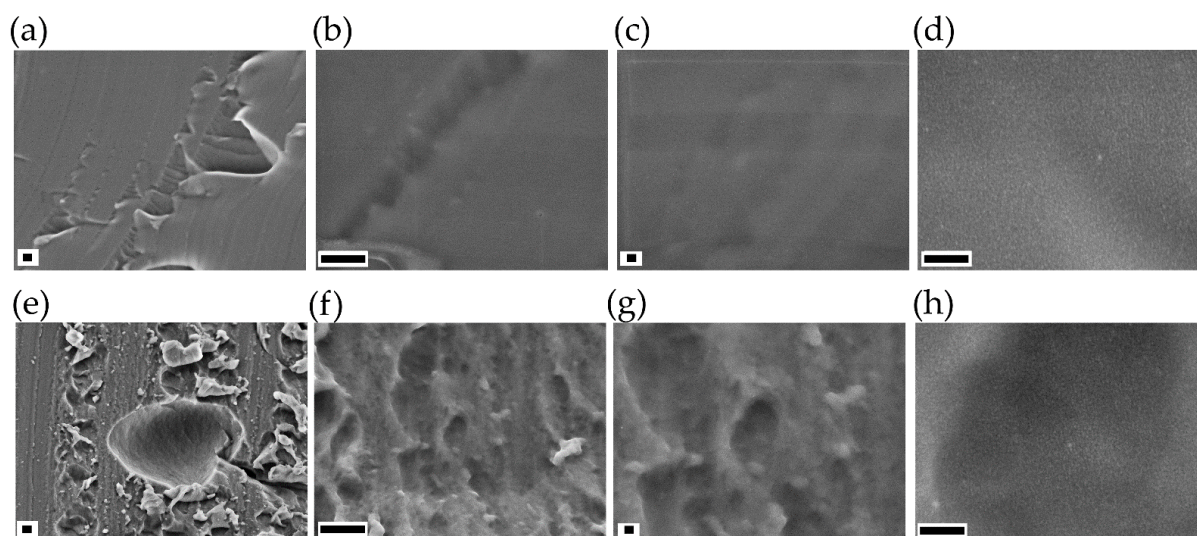

**Figure S3.** SEM images at different magnification of samples with 24%wt of PEGDA and without AgNCs (a)-(d) (from left to right: 10kX scale bare 1  $\mu$ m, 50kX scale bar 1  $\mu$ m, 100kX scale bar 100 nm, 500kX scale bar 100 nm); and with 180 mg of AgNCs-PMAA (e)-(h) (from left to right: 10kX scale bare 1  $\mu$ m, 50kX scale bar 1  $\mu$ m, 100kX scale bar 100 nm, 500kX scale bar 100 nm).

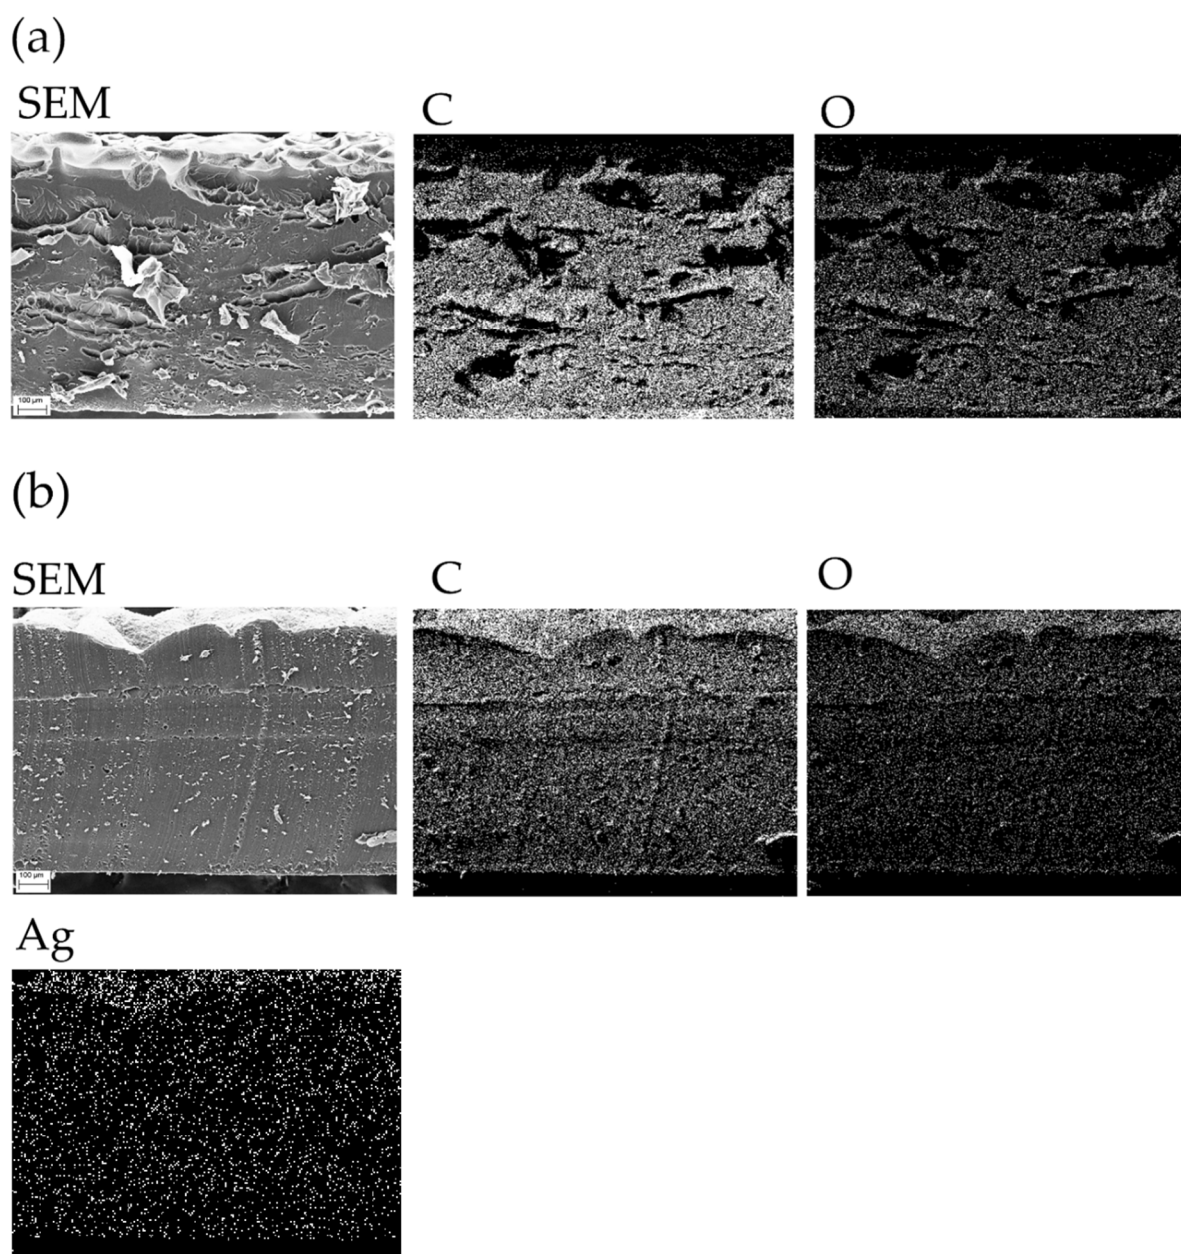

**Figure S4.** Map distributions of chemical elements of hydrogel samples after the filtration of 1500 ppm of Pb(II): (a) unmodified and (b) modified filters.

**Table S1.** Elemental composition of filters as a function of the different areas of interest. Samples were sputtered with gold prior to the analyses.

| Sample | Area   | Element | % in weight | Sample | Area   | Element | %in weight |
|--------|--------|---------|-------------|--------|--------|---------|------------|
| 1-0    | Top    | C       | 56.45       | 1-C    | Top    | C       | 59.92      |
|        |        | O       | 41.39       |        |        | O       | 29.35      |
|        |        | Au      | 0.39        |        |        | Au      | 1.38       |
|        |        | Pb      | 1.77        |        |        | Na      | 0.53       |
|        |        | Tot.    | 100.00      |        |        | Ag      | 0.40       |
|        | Center | C       | 52.98       |        | Center | Pb      | 8.43       |
|        |        | O       | 46.13       |        |        | Tot.    | 100.00     |
|        |        | Au      | 0.32        |        |        | C       | 51.36      |
|        |        | Pb      | 0.57        |        |        | O       | 28.03      |
|        |        |         |             |        |        |         |            |

|        |      |        |        |      |        |
|--------|------|--------|--------|------|--------|
| Bottom | Tot. | 100.00 | Bottom | Au   | 2.68   |
|        | C    | 58.56  |        | Na   | 1.32   |
|        | O    | 40.67  |        | Ag   | 2.11   |
|        | Au   | 0.20   |        | Pb   | 14.50  |
|        | Pb   | 0.57   |        | Tot. | 100.00 |
|        | Tot. | 100.00 |        | C    | 60.75  |
| Bottom |      |        | Bottom | O    | 32.39  |
|        |      |        |        | Au   | 0.48   |
|        |      |        |        | Na   | 0.58   |
|        |      |        |        | Ag   | 0.61   |
|        |      |        |        | Pb   | 5.18   |
|        |      |        |        | Tot. | 100.00 |

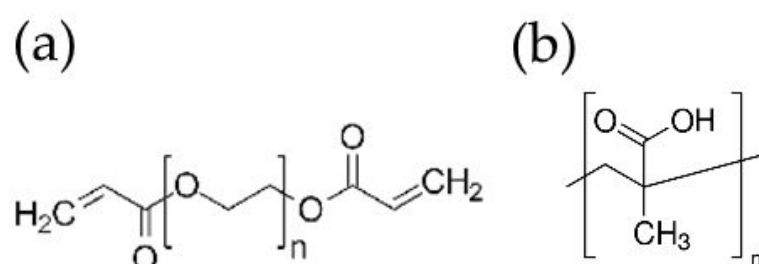

**Figure S5.** Chemical structure of PEGDA molecule (a) and PMAA molecule (b).
